# Supplementary material for: Laser-assisted synthesis of multi-colored protein dots and their biological distribution in experimental mice using a dye tracking method
Source: Royal Society of Chemistry journal article supplement (doi:10.1039/c4ra09815c), 2014-12-15
Supplement: c4ra09815c1.pdf [file c4ra09815c1.pdf]

## Supplementary information

### Laser assisted synthesis of Multi-colored Protein dots and their biological distribution in mice using Dye tracking method: A novel approach to deliver therapeutic payloads to central nervous system

Sunil Pandey<sup>1,2</sup>, Mukeshchand Thakur<sup>6</sup>, Abou Talib<sup>3</sup>, M. Shahnawaz Khan<sup>3</sup>, Mukesh Lavkush Bhaire<sup>1</sup>, Shou-Mei Wu<sup>4</sup>, Hui-Fen Wu<sup>\*1,2,3,4,5</sup>

<sup>1</sup>Department of Chemistry, National Sun Yat-Sen University, Kaohsiung, 70, Lien-Hai Road, Kaohsiung, 80424, Taiwan

<sup>2</sup>Center for Nanoscience and Nanotechnology, National Sun Yat-Sen University, 70, Lien-Hai Road, Kaohsiung, 80424, Taiwan

<sup>3</sup>Doctoral Degree Program in Marine Biotechnology, National Sun Yat-Sen University, Kaohsiung, 80424, Taiwan

<sup>4</sup>School of Pharmacy, College of Pharmacy, Kaohsiung Medical University, Kaohsiung, 800, Taiwan

<sup>5</sup>Institute of Medical Science and Technology, National Sun Yat-Sen University, Kaohsiung, 80424, Taiwan

<sup>6</sup>Department of Biotechnology and Bioinformatics, Padmashree Dr. D.Y. Patil University, CBD Belapur, Navi Mumbai- 400 614, Maharashtra, India

\*Corresponding author, Phone: +886-7-5252000-3955; Fax: +886-7-5253908  
Email: [hwu@faculty.nsysu.edu.tw](mailto:hwu@faculty.nsysu.edu.tw)

---

#### S1 Quantum yield calculation

As a reference using- Quinine sulphate (QY,  $\Phi = 58\%$ ) at excitation wavelength- 250 nm [1] for calculating QY for C-dots using following formula:

$$\Phi_S = \Phi_R [A_R(\lambda_R) n_S^2 I_S] / [A_S(\lambda_S) n_R^2 I_R]$$

$\Phi_S$  and  $\Phi_R$  are quantum yields of sample and referencerespectively;  $A_R(\lambda_R)$  and  $A_S(\lambda_S)$  are the absorbance of the reference and sample at excitation wavelengths;  $n_S$  and  $n_R$  are refractive indices of the sample medium and reference medium respectively;  $I_S$  and  $I_R$  are the integrated fluorescence intensities of sample and reference respectively. QY obtained were C-dots<sub>Red</sub> were calculated to be 13.1% and C-dots<sub>Green</sub> as 15.32%.

## Reference

[1] W.H. Melhuish, J. Phys. Chem. 65 (1961) 229– 235.

## S2 In vitro cell viability assay

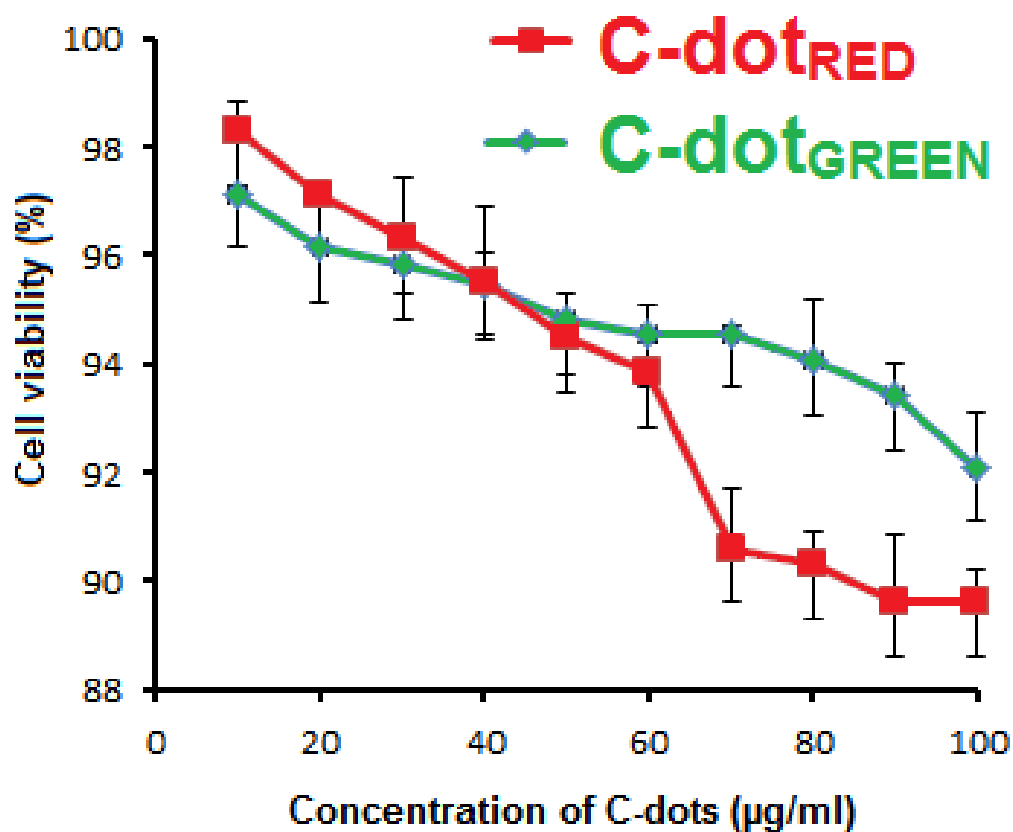

Fig.S2 Cellular viability using MTT assay showing effect of carbon dots (green and red) on vero cell lines post 24 h. Data showing mean of experiments performed in triplicates.
